# Supplementary material
Source: PubMed Central journal article supplement (PMC5686534)

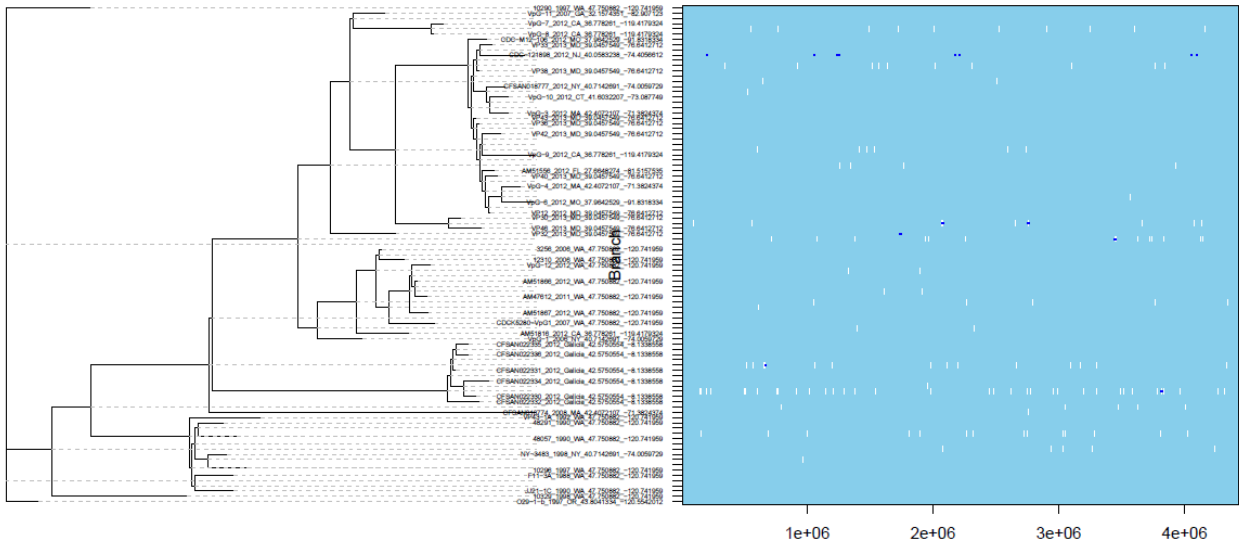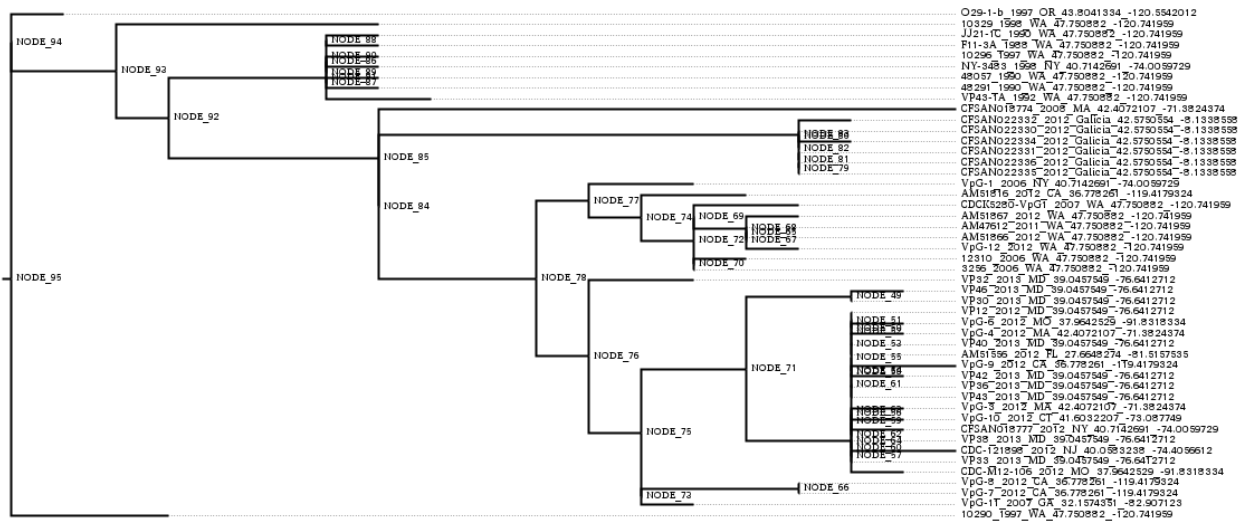

Supplement: mbo006173592sf1.pdf [file mbo006173592sf1.pdf]

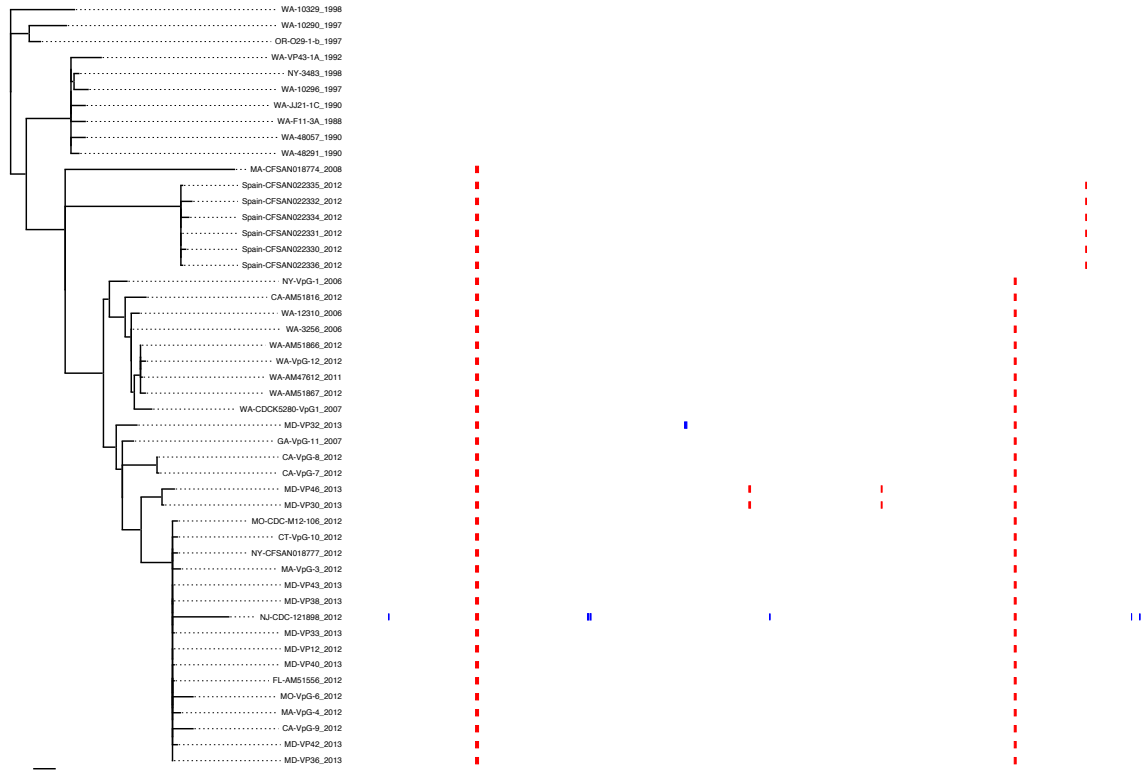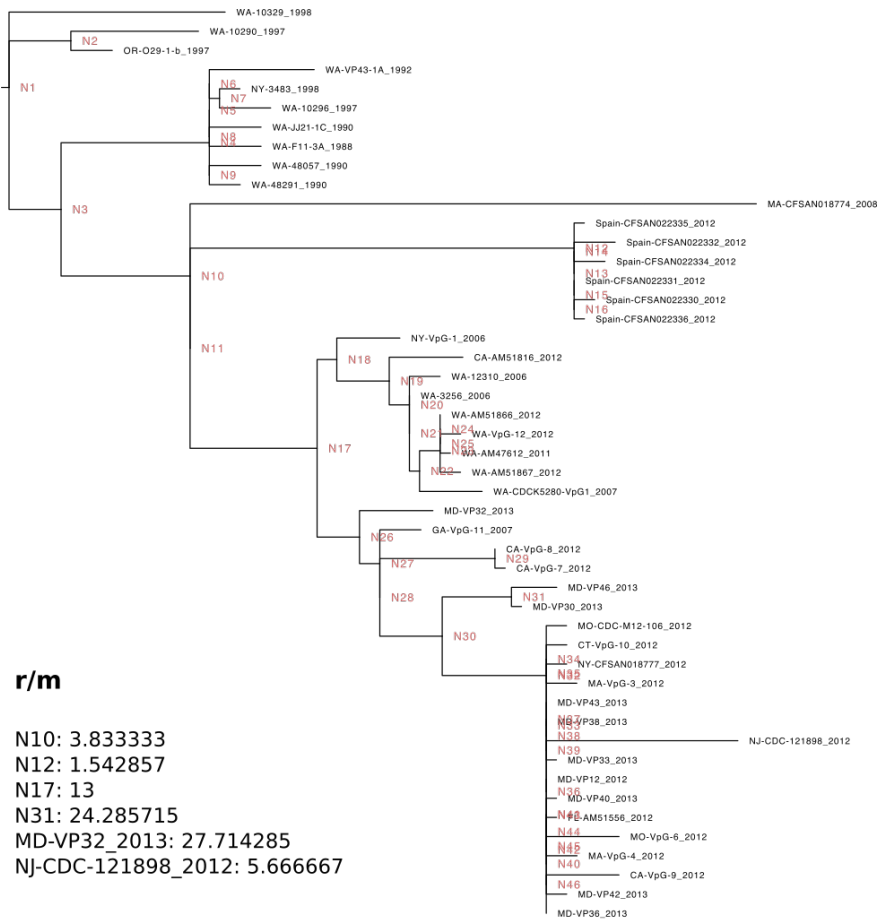

r/m

- N10: 3.833333
- N12: 1.542857
- N17: 13
- N31: 24.285715
- MD-VP32\_2013: 27.714285
- NJ-CDC-121898\_2012: 5.666667

Supplement: mbo006173592sf2.pdf [file mbo006173592sf2.pdf]

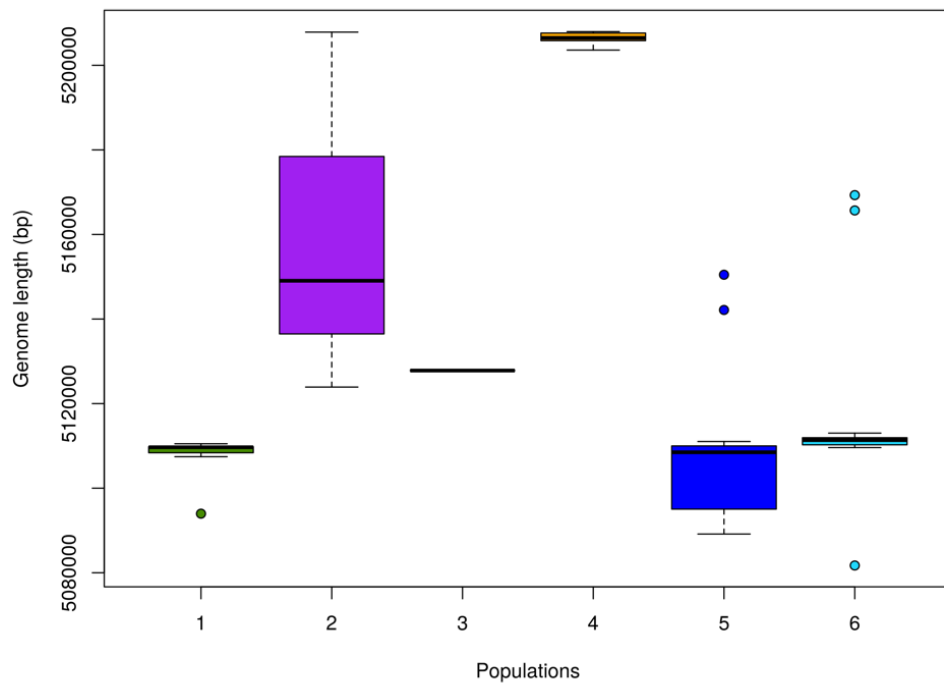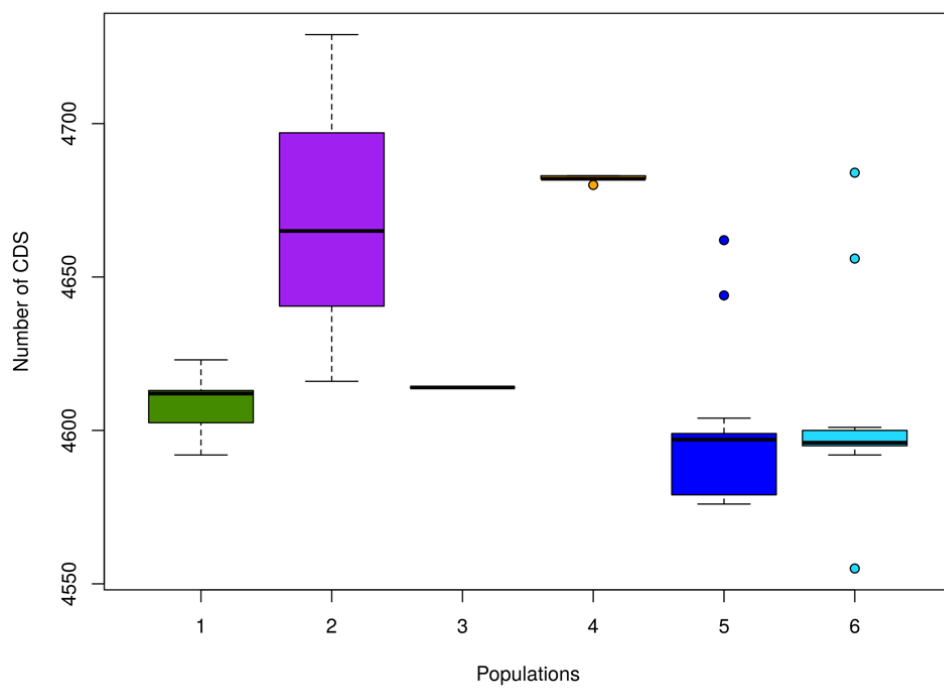

Supplement: mbo006173592sf4.pdf [file mbo006173592sf4.pdf]
